# Supplementary material for: Rab22a-NeoF1 fusion protein promotes osteosarcoma lung metastasis through its secretion into exosomes
Source: PubMed Central journal article supplement (PMC7876000; doi:10.1038/s41392-020-00414-1), 2021-02-11
Supplement: 41392_2020_414_MOESM1_ESM.pdf [file 41392_2020_414_MOESM1_ESM.pdf]

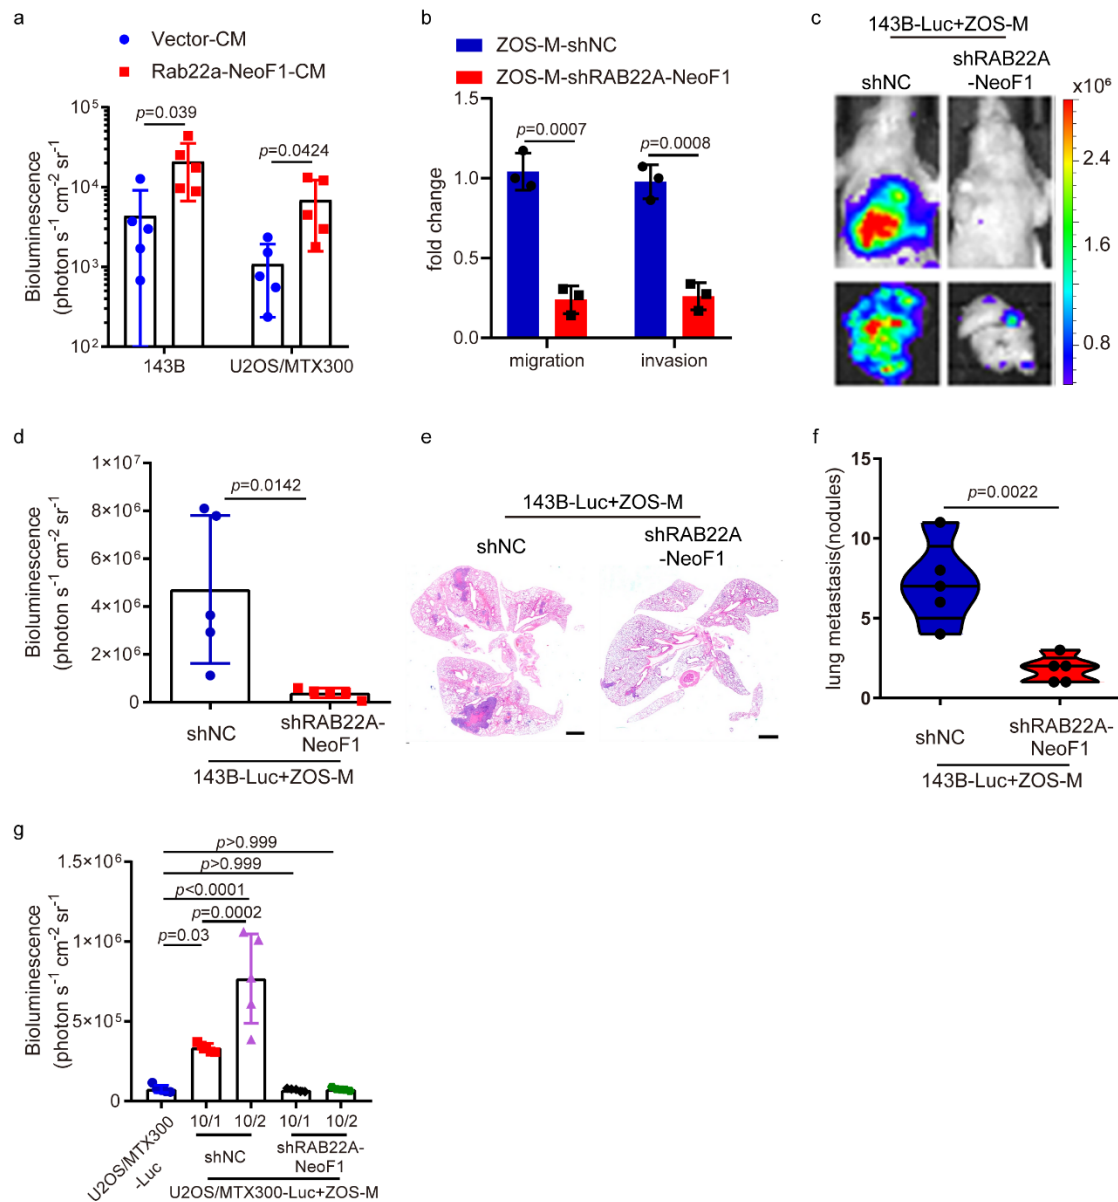

18

19 **Figure. S1. The secreted RAB22A-NeoF1 fusion protein enhances**  
20 **metastasis in osteosarcoma.**

21 **(a)** Bioluminescence analyses of lung metastases from mice orthotopically  
22 injected with the indicated cells under treatment of either Vector-CM or  
23 RAB22A-NeoF1 CM.  $n = 5$  biologically independent mice. Data are mean  $\pm$  s.d.  
24  $P$  values are shown.

25 **(b)** 143B cells were co-cultured with the indicated stable cells for 5 days and  
26 then were subjected to migration and invasion assays. Data are mean  $\pm$  s.d. of  
27  $n = 3$  biologically independent experiments.  $P$  values are shown.

28 **(c-f)** Representative IVIS imaging **(c)**, Bioluminescence analyses **(d)**

29 H&E-stained lung sections (**e**) and quantification of lung metastatic foci (**f**) from  
30 mice orthotopically co-injected 143B-Luc cells with either ZOS-M-shNC cells or  
31 ZOS-M-shRAB22A-NeoF1 cells at the 1:1 ratio. n = 5 biologically independent  
32 mice. Data are mean  $\pm$  s.d. *P* values are shown. Scale bar, 2mm.

33 (**g**) Bioluminescence analyses of lung metastases from mice orthotopically  
34 injected U2OS/MTX300-Luc cells alone or with either ZOS-M-shNC cells or  
35 ZOS-M-shRAB22A-NeoF1 cells at the indicated 10:1 and 10:2 ratios. n = 5  
36 biologically independent mice. Data are mean  $\pm$  s.d. *P* values are shown.

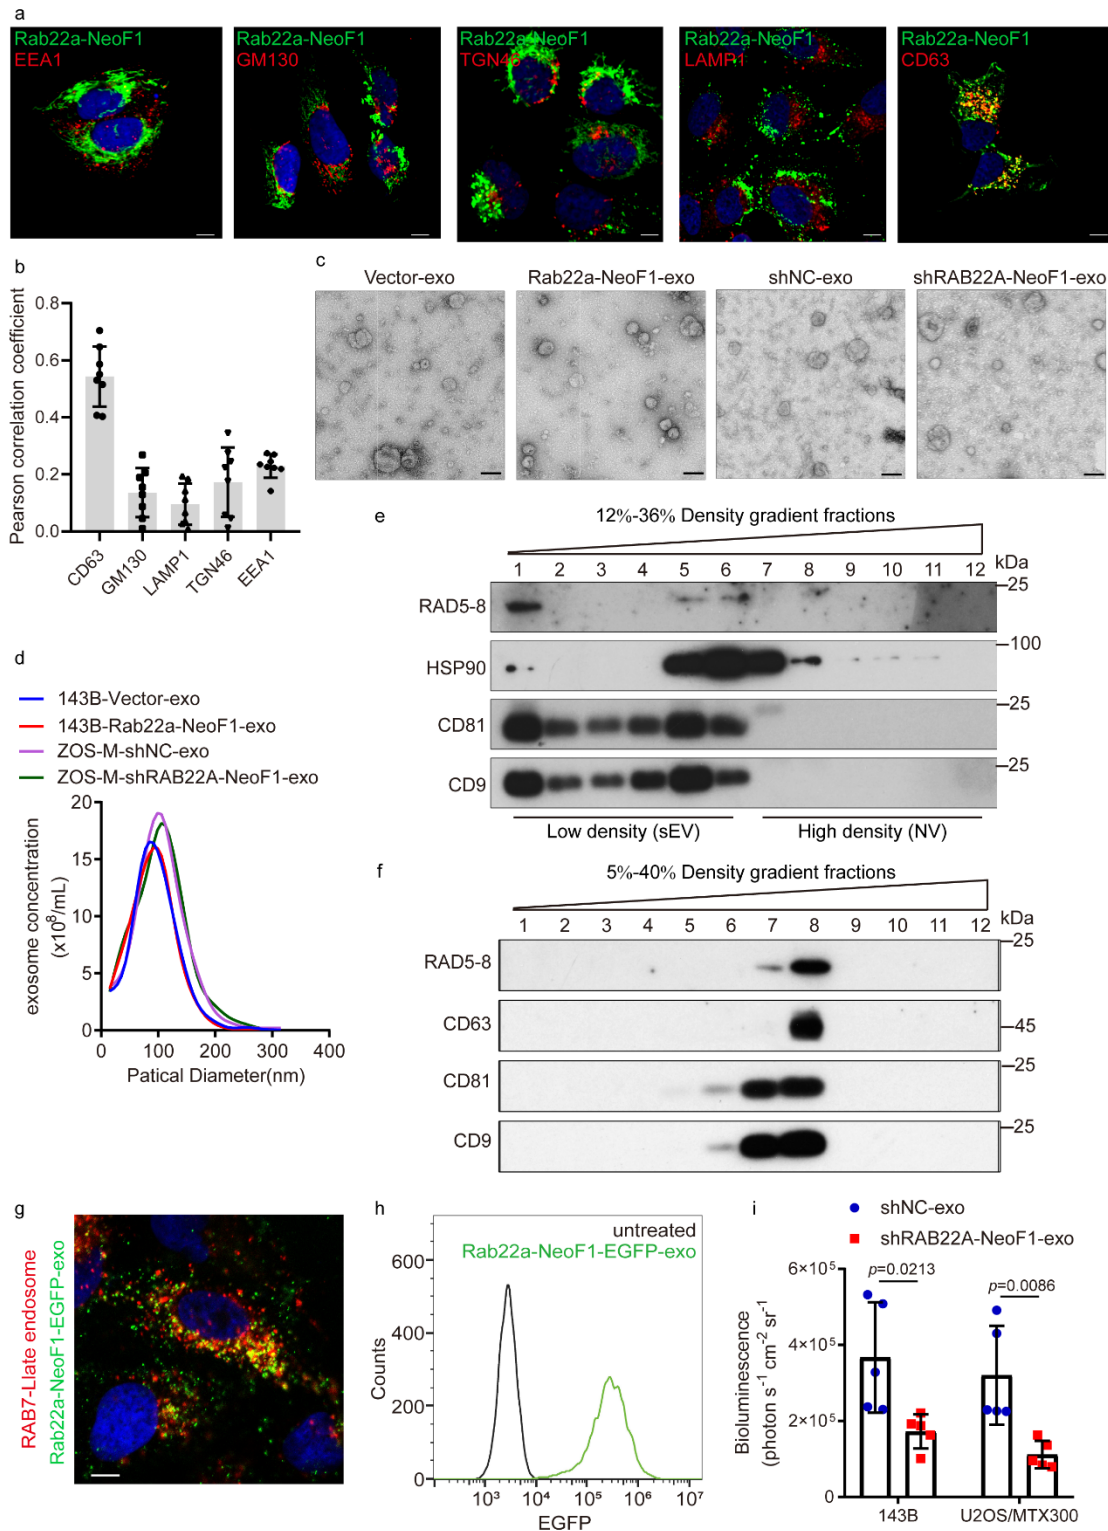

37

38 **Figure. S2. The RAB22A-NeoF1 fusion protein is present in exosomes to**  
 39 **promote osteosarcoma metastasis.**

40 (a) Representative images of immunofluorescence staining for both  
 41 intracellular RAB22A-NeoF1 and the indicated subcellular markers in U2OS  
 42 cells stably expressing RAB22A-NeoF1. Scale bar, 5 μm.

43 **(b)** Pearson correlation coefficients (PCCs) were calculated from multiple  
44 individual cells expressing RAB22A-NeoF1 and the indicated subcellular  
45 markers. mean  $\pm$  SD. n = 8 fields. Data are mean  $\pm$  s.d.

46 **(c)** Characterization of exosomes derived from the indicated stable 143B cells  
47 and stable ZOS-M cells using nanoparticle tracking analysis.

48 **(d)** Representative TEM images of the purified exosomes derived from the  
49 indicated stable 143B (up two panels) and stable ZOS-M cells (low two panels).  
50 Scale bar, 100nm.

51 **(e, f)** 12-36% **(e)** and 5%-40% **(f)** iodixanol density gradients centrifugation  
52 was performed using the exosomes derived from 143B cells stably expressing  
53 RAB22A-NeoF1 as described in "Materials and Methods" and followed by  
54 Western blotting. Data in e and f are representative of n = 3 biologically  
55 independent experiments.

56 **(g)** Representative confocal microscopy image of U2OS cells treated with  
57 exosomes derived from 143B cells stably expressing Rab22a-NeoF1-EGFP  
58 (Rab22a-NeoF1-EGFP-exo) for 15min. The late endosomes (Red, denoted by  
59 RAB7) and GFP signals (Green) were shown. Scale bar, 5 $\mu$ m.

60 **(h)** The U2OS cells were treated with or without exosomes derived from 143B  
61 cells stably expressing Rab22a-NeoF1-GFP (Rab22a-NeoF1-EGFP-exo) for  
62 15 min, and subjected to flow cytometry analysis.

63 **(i)** Bioluminescence analyses of lung metastases from mice orthotopically  
64 injected with the indicated cells under treatment of exosomes derived from the  
65 indicated stable ZOS-M cells. n = 5 biologically independent mice. Data are  
66 mean  $\pm$  s.d. *P* values are shown.

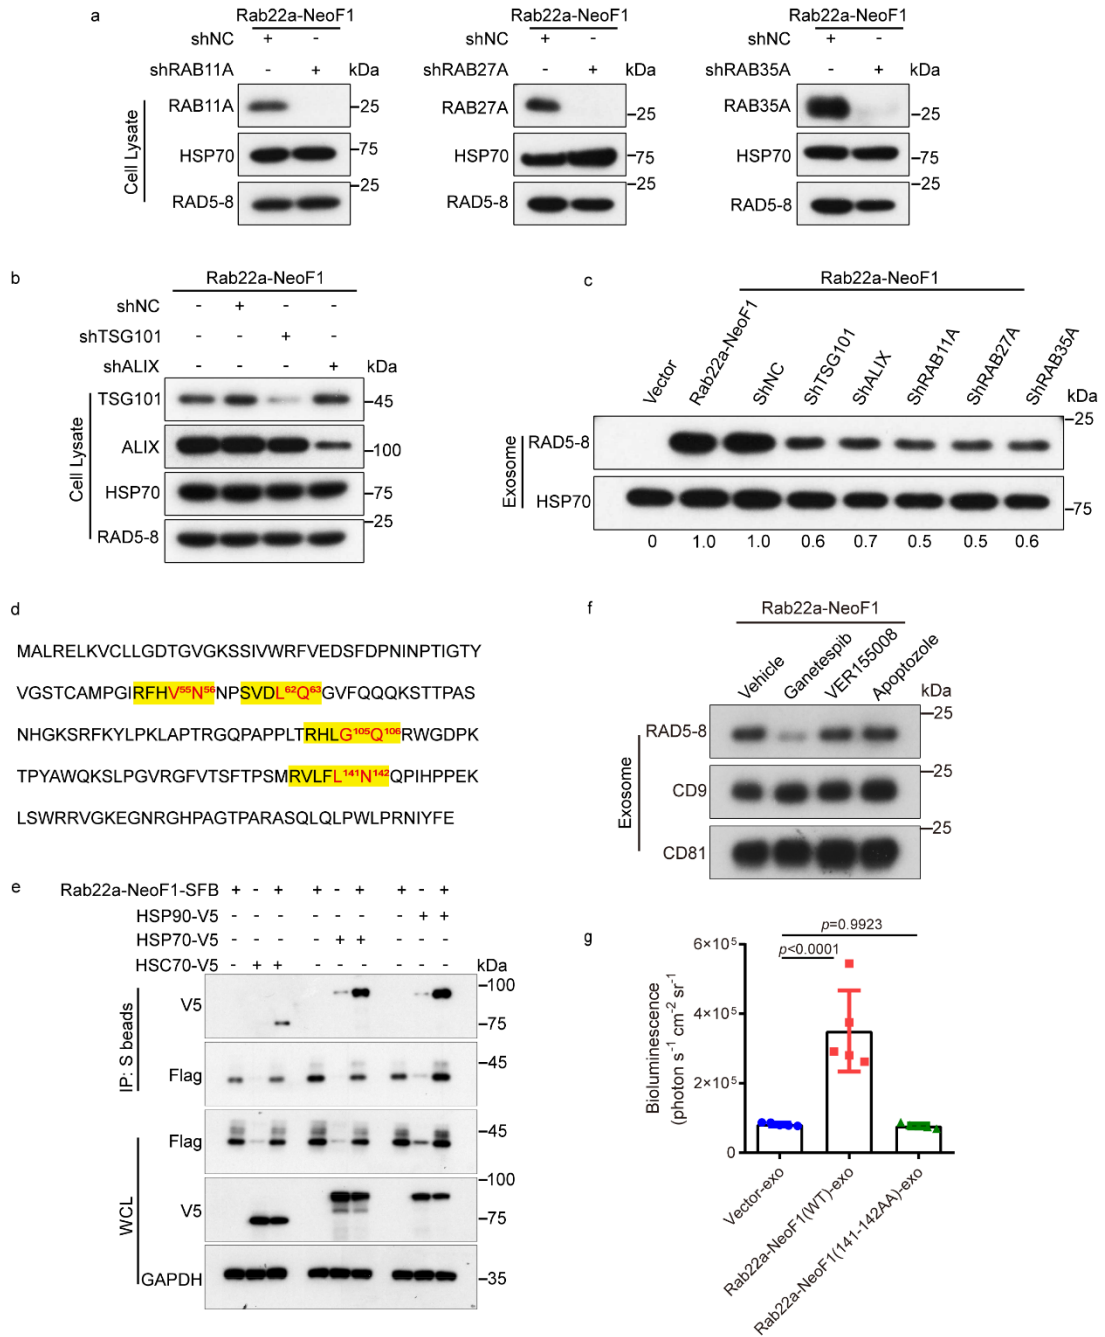

67

68 **Figure. S3. RAB22A-NeoF1 fusion protein is sorted into exosomes via**  
 69 **binding to HSP90 to promote osteosarcoma metastasis**

70 (a, b) The indicated stable 143B cells were lysed and analyzed by Western  
 71 blotting.

72 (c) The exosomes from the indicated stable 143B cells were purified and  
 73 analyzed by Western blotting. The relative intensity of RAB22A-NeoF1 was  
 74 quantified with ImageJ software and normalized with HSP70. Data in a-c are  
 75 representative of n = 3 biologically independent experiments.

76

77 **(d)** The protein sequence of RAB22A-NeoF1. The yellow region indicates four  
78 KFERQ-like motifs (aa52-56, aa59-63, aa102-106 and aa137-142) and  
79 mutated amino acids are highlighted in red.

80 **(e)** 293T cells were co-transfected with the indicated plasmids and then were  
81 lysed and analyzed by immunoprecipitation using S protein beads and  
82 Western blotting.

83 **(f)** The 143B cells stably expressing Rab22a-NeoF1 were treated with the  
84 HSP90 inhibitor (Ganetespib), HSP70 and HSC70 inhibitors (VER155008 and  
85 Apoptozole) for 24h, and then the exosomes were purified and analyzed by  
86 Western blotting. Data in e and f are representative of n = 3 biologically  
87 independent experiments.

88 **(g)** Bioluminescence analysis of lung metastasis from mice orthotopically  
89 injected 143B-Luc cells with exosomes derived from the indicated stable 143B  
90 cells. n = 5 biologically independent mice. Data are mean  $\pm$  s.d. *P* values are  
91 shown.





99 Proteins with significant increase from exosomes positive for RAB22A-NeoF1  
100 were marked in red.

101 **(c)** 293T cells were co-transfected with the indicated plasmids and then were  
102 lysed and analyzed by immunoprecipitation using anti-Flag beads or anti-V5  
103 beads and Western blotting.

104 **(d)** 143B cells treated with exosomes derived from the indicated stable 143B  
105 cells for 1 h, and then were subjected to the RhoA activation assay. The  
106 relative intensity of RhoA-GTP quantified with ImageJ software and normalized  
107 with RhoA-Total. Data in c and d are representative of  $n = 3$  biologically  
108 independent experiments.

109 **(e)** U2OS and 143B cells were treated with or without RhoA inhibitor CT04 for  
110 4h, and then were incubated with exosomes derived from the indicated stable  
111 143B cells for 24h. The cells were then collected and subjected to migration  
112 and invasion assays. Data are mean  $\pm$  s.d. of  $n = 3$  biologically independent  
113 experiments. *P* values are shown.

114 **(f)** The exosomes and cell lysates were prepared from the indicated stable  
115 143B cells, and then were analyzed by Western blotting. Data are  
116 representative of  $n = 3$  biologically independent experiments.

117 **(g)** Bioluminescence analysis of lung metastatic foci from mice orthotopically  
118 injected 143B-Luc cells, and then were treated with the indicated exosomes.  
119  $n = 5$  biologically independent mice. Data are mean  $\pm$  s.d. *P* values are shown.

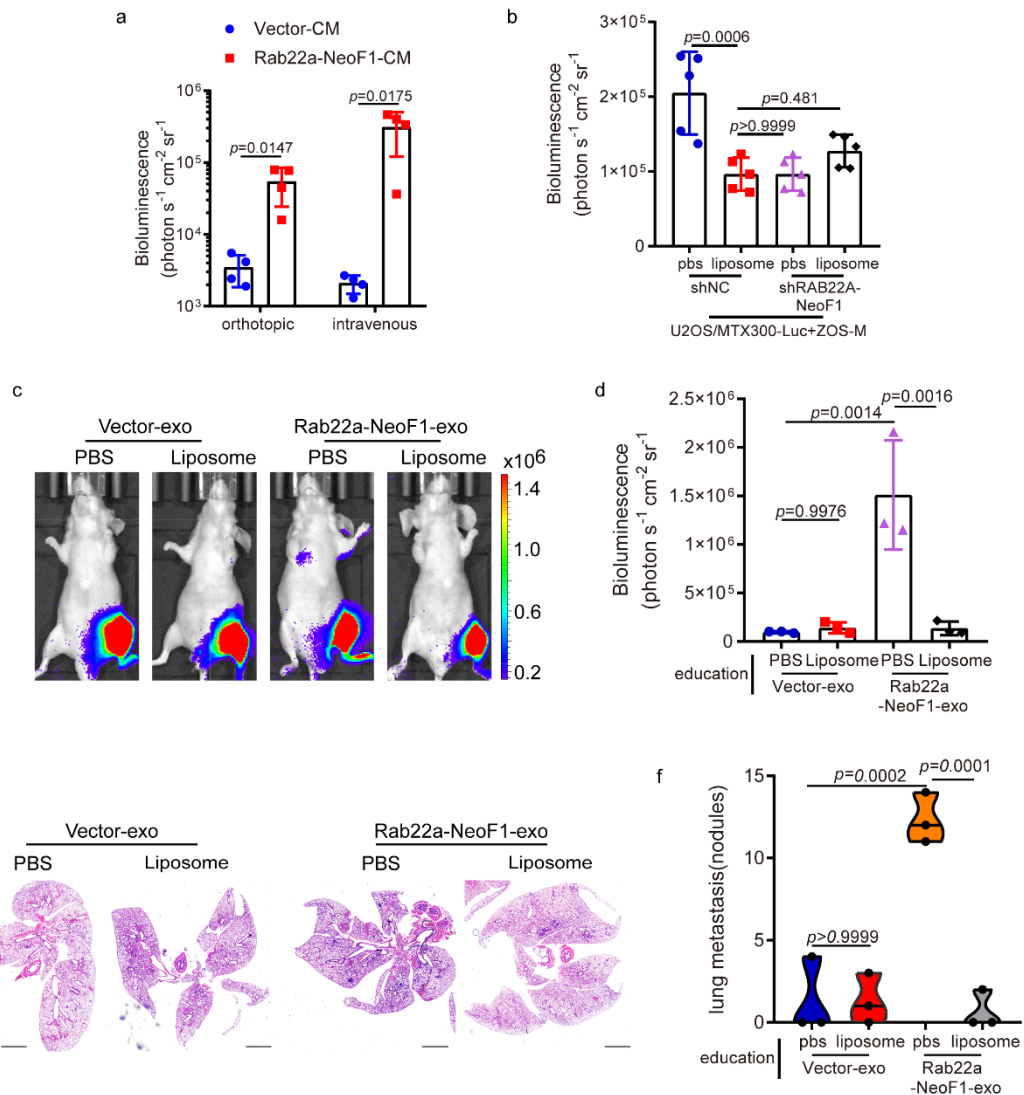

120

121 **Figure. S5. The functions of exosomal RAB22A-NeoF1 fusion protein**  
 122 **requires recruiting BMDMs to pulmonary pre-metastatic niche.**

123 (a) Mice were pre-educated with the indicated conditioned media (CM) for 3  
 124 weeks, and then were orthotopically or tail vein injected with 143B-Luc cells.  
 125 The lung metastases were analyzed by Bioluminescence after 3 weeks. n =4  
 126 biologically independent mice. Data are mean ± s.d. *P* values are shown.

127 (b) Mice orthotopically co-injected U2OS/MTX300-Luc cells with the indicated  
 128 stable ZOS-M cells at the 10:1 ratio, and then intravenously injected liposome  
 129 or PBS twice a week. The lung metastases were analyzed by bioluminescence.  
 130 n = 5 biologically independent mice. Data are mean ± s.d. *P* values are shown.

131 (c-f) Mice were pre-educated with the indicated exosomes combined with  
 132 liposome or PBS for 3 weeks, and then were orthotopically injected with

133 143B-Luc cells. The lung metastases were analyzed after 3 weeks.  
134 Representative IVIS imaging (c), Bioluminescence analysis (d), H&E-stained  
135 lung sections (e), Quantification of lung metastatic foci (f). n = 3 biologically  
136 independent mice. Data are mean  $\pm$  s.d. *P* values are shown. Scale bar, 2mm.

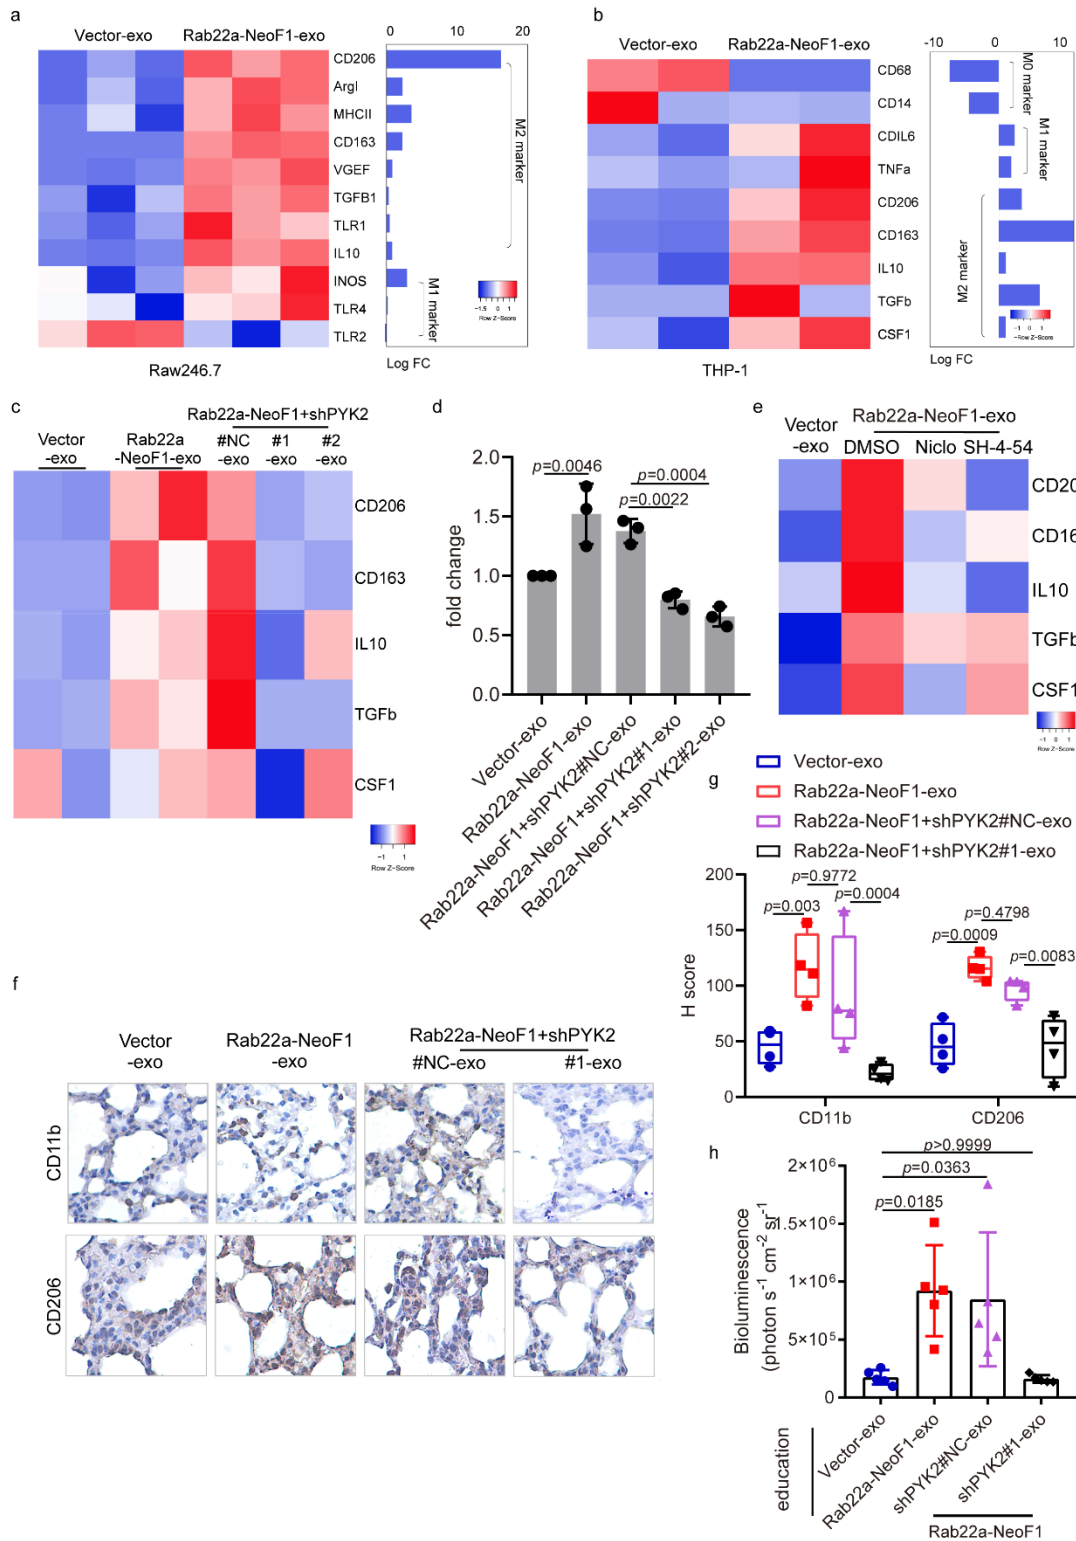

137

138

**Figure. S6. The exosomal RAB22A-NeoF1 fusion protein promotes M2 polarization in its recipient macrophages via its binding partner PYK2.**

139

140

**(a, b)** Raw264.7 cells **(a)** and THP-1 cells **(b)** were incubated with the indicated

141

exosomes for 24 h, and differential expression patterns of the M0, M1 and M2

142

phenotype markers were presented by a heatmap.

143 (c) THP-1 cells were incubated with the indicated exosomes for 24 h, and  
144 differential expression patterns of the M2 polarization macrophage markers  
145 were presented by a heatmap.

146 (d) Raw264.7 cells were incubated with the indicated exosomes for 24h, and  
147 were subjected to migration assays. Data are mean  $\pm$  s.d. of n = 3 biologically  
148 independent experiments. *P* values are shown.

149 (e) Raw264.7 cells were treated the indicated exosomes with or without the  
150 indicated Stat3 inhibitor, Niclosamide or SH-4-54, for 24h and expression of  
151 M2-like macrophage markers were present by a heatmap.

152 (f, g) Mice lungs were pre-educated with the indicated exosomes for 3 weeks,  
153 and the CD11b and CD206 expression were analyzed by IHC. Representative  
154 staining imaging (f) and relative H-score of CD11b and CD206 (g). n = 4  
155 biologically independent mice. Data are mean  $\pm$  s.d. *P* values are shown.

156 (h) Mice were pre-educated with the indicated exosomes for 3 weeks, and  
157 then were orthotopically injected with 143B-Luc cells. The lung metastases  
158 were analyzed after 3 weeks. The lung metastases were analyzed by  
159 bioluminescence. n = 5 biologically independent mice. Data are mean  $\pm$  s.d. *P*  
160 values are shown.

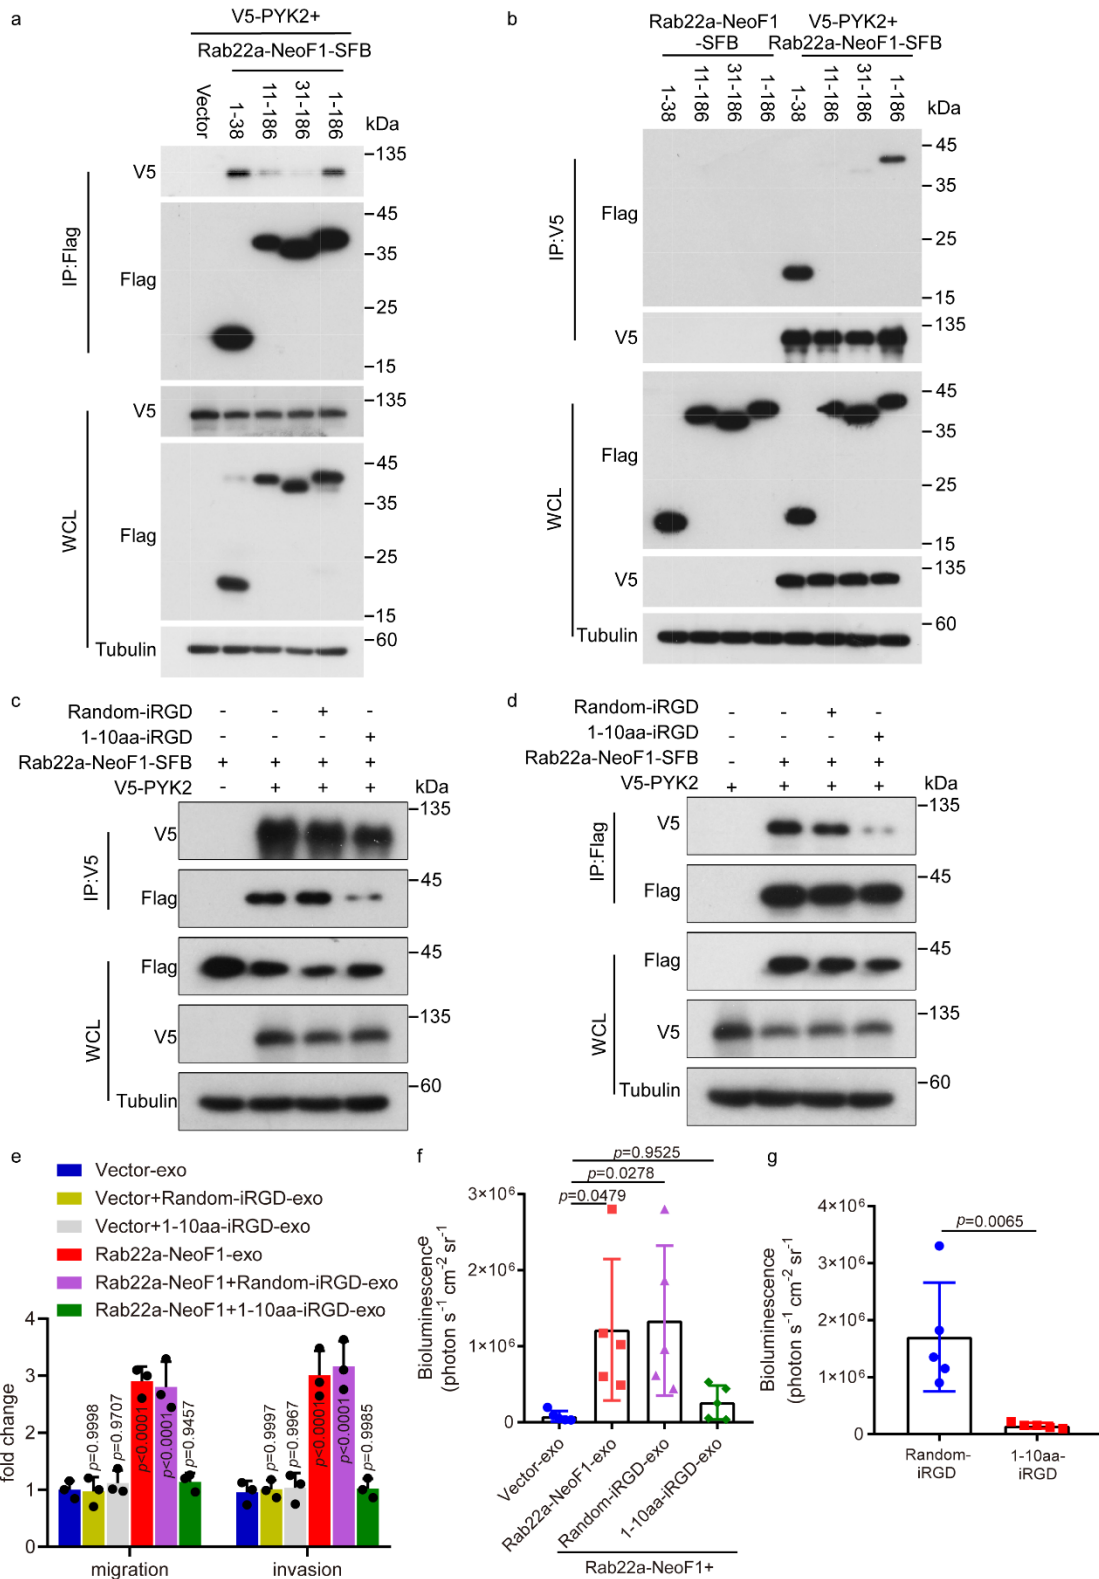

161  
162 **Figure. S7. The 1-10aa of RAB22A-NeoF1 is responsible for its binding to**  
163 **PYK2.**

164 (a, b) 293T cells were co-transfected with the indicated plasmids and then  
165 were lysed and analyzed by immunoprecipitation using anti-Flag beads (a) or

166 anti-V5 beads **(b)** followed by Western blotting.

167 **(c, d)** 293T cells were co-transfected with the indicated plasmids and treated  
168 with the indicated peptide for 24 h, and then were lysed and analyzed by  
169 immunoprecipitation using anti-V5 beads **(c)** or anti-Flag beads **(d)** followed by  
170 Western blotting. Data in a-d are representative of n = 3 biologically  
171 independent experiments.

172 **(e)** U2OS cells were treated with the indicated exosomes for 24h, and then  
173 were subjected to migration and invasion assays. Data are mean  $\pm$  s.d. of n = 3  
174 biologically independent experiments. P values are shown.

175 **(f)** Bioluminescence analysis of lung metastatic foci from mice orthotopically  
176 injected 143B-Luc cells with the indicated exosomes. n = 5 biologically  
177 independent mice. Data are mean  $\pm$  s.d. P values are shown.

178 **(g)** Bioluminescence analysis of lung metastatic foci from mice orthotopically  
179 co-injected U2OS/MTX300-Luc cells with ZOS-M cells at the 10:1 ratio under  
180 the treatment of either 1-10aa-iRGD or random-iRGD peptide. n = 5  
181 biologically independent mice. Data are mean  $\pm$  s.d. P values are shown.

a Rab22a-NeoF2: MALRELKVCLLGDTGVGKSSIVWRFVEDSFDPNINPTIGTVHNIKGTNPDAYQ  
 Rab22a-NeoF3: MALRELKVCLLGDTGVGKSSIVWRFVEDSFDPNINPTIGFLILEGCCPSYLRG  
 Rab22a-NeoF4: MALRELKVCLLGDTGVGKSSIVWRFVEDSFDPNINPTIGWSFTLVIPAGMQWHDLGSL  
 QPPPPGFKQFACLSLLRSWNYRCSQPHLANFCSFSRDGVSPCWPGWSRTPDLR  
 Rab22a-NeoF5: MALRELKVCLLGDTGVGKSSIVWRFVEDSFDPNINPTIGSRVQPCPWPF~~QLVVG~~DWFRYGHMT  
 Rab22a-NeoF6: MALRELKVCLLGDTGVGKSSIVWRFVEDSFDPNINPTIGFKPIFPKDIQIGISI

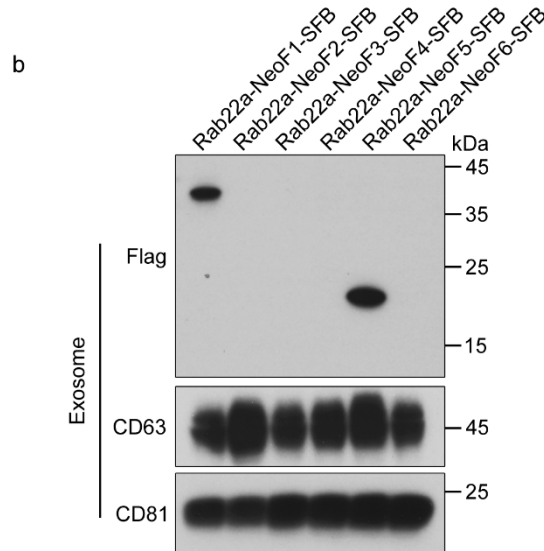

182

183 **Figure. S8. Secretion of RAB22A-NeoFs proteins**

184 (a) The protein sequences of RAB22A-NeoF2-6. The yellow region indicates  
 185 the KFERQ-like motif (aa52-57).

186 (b) The exosomes derived from the indicated stable 143B cells were purified  
 187 and subjected to Western blotting. Data are representative of n = 3 biologically  
 188 independent experiments.



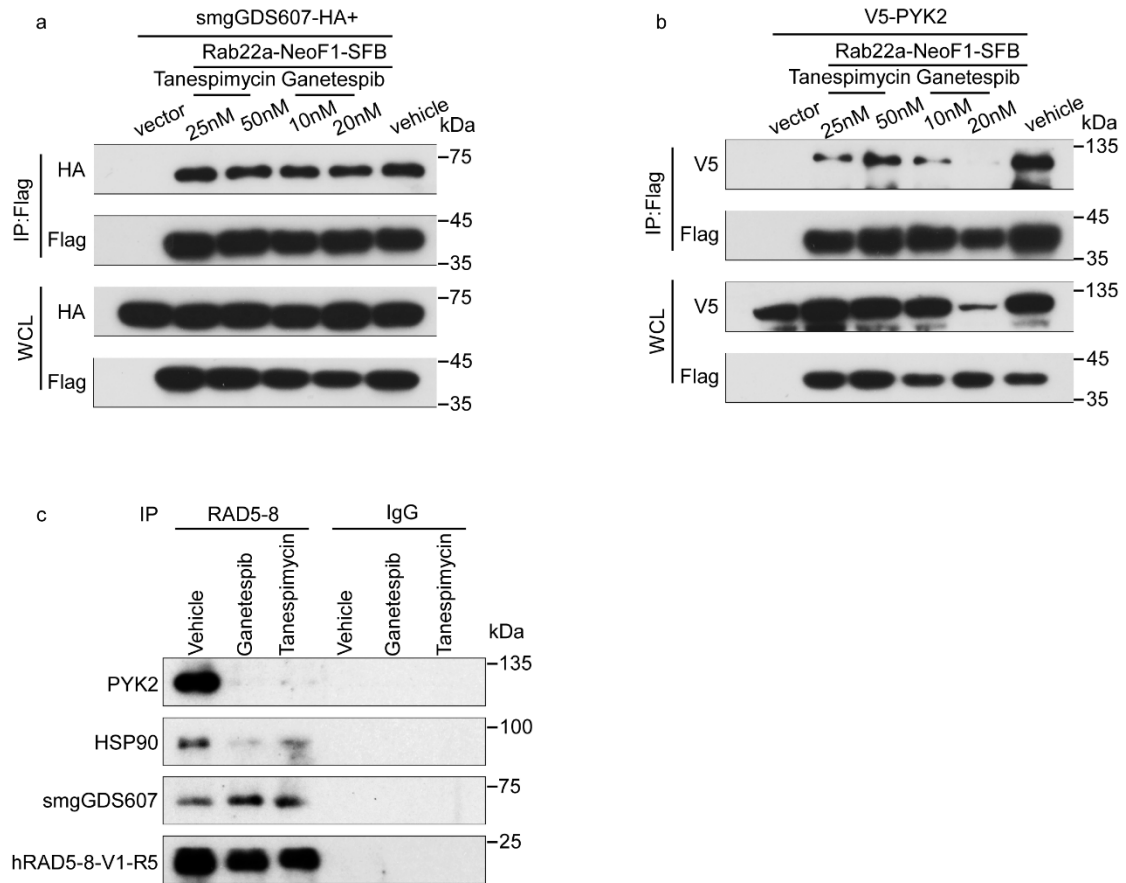

189

190 **Figure. S9. The interaction of RAB22A-NeoF1 fusion protein with PYK2,**  
 191 **but not with smgGDS607, is dependent on its binding to HSP90.**

192 (a, b) 293T cells were co-transfected with the indicated plasmids and treated  
 193 with the indicated HSP90 inhibitors for 24 h, and then were lysed and analyzed  
 194 by immunoprecipitation using anti-Flag beads followed by Western blotting.

195 (c) ZOS-M cells were treated with the indicated HSP90 inhibitors for 24 h and  
 196 then were lysed and subject to immunoprecipitation using IgG and mAb  
 197 RAD5-8 followed by Western blotting. Data in a-c are representative of n = 3  
 198 biologically independent experiments.
